# Supplementary material
Source: publisher figshare collection journal article supplement (https://adisjournals.figshare.com/articles/dataset/_/14573511)
Supplement: Supplementary file 1 [file 1]

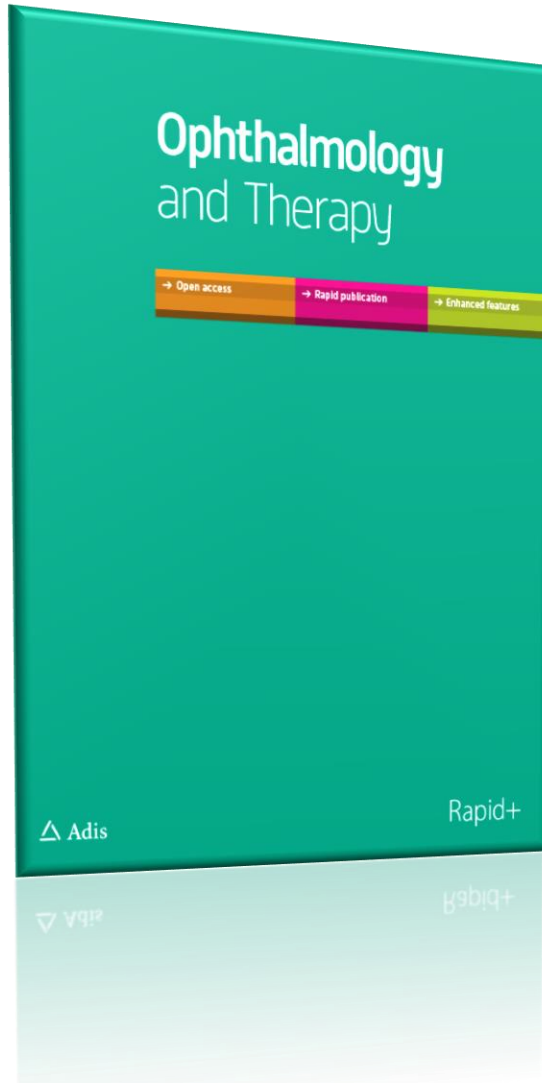

## Caswell, D et al. Seeing Beyond Anatomy: Quality of Life with Geographic Atrophy. Ophthalmol Ther. 2021. 10.1007/s40123-021- 00352-3

This slide deck represents the opinions of the authors. For a full list of declarations, including funding and author disclosure statements, please see the full text online.

© The authors, CC-BY-NC 2021.

## Introduction

- In this article, I, Dolores - a person with geographic atrophy, Bill - my carer and husband, and Jill - a quality of life scientist, discuss how geographic atrophy can change quality of life

- Quality of life means different things to different people, from being happy to being able to do what they want in life
- Asking about a person's 'quality of life' is one way to find out about their wellbeing

- Diseases that cause vision loss have a big impact on quality of life
- Geographic atrophy (also known as GA) is an eye disease that leads to vision loss

- Vision loss in geographic atrophy often means that people can no longer do their hobbies or other day-to-day tasks
- People with geographic atrophy can feel lonely or isolated from other people

- Learning how to use smartphone apps and gadgets can help people with geographic atrophy continue hobbies and daily life
- The support of friends, family, and doctors is also very important for a good quality of life

## Conclusions

- Treatment for people with vision loss needs to consider all parts of a person's life
- Training for doctors should continue to emphasise that people with geographic atrophy are more than just eyes that cannot be treated
